# Supplementary material for: Systems Metabolic Engineering of Saccharomyces cerevisiae for the High-Level Production of (2S)-Eriodictyol
Source: MDPI journal article supplement (doi:10.3390/jof10020119), 2024-01-31
Supplement: s1 [file s1]

## Supplemental Materials

Document S1:

### Supplementary Figures

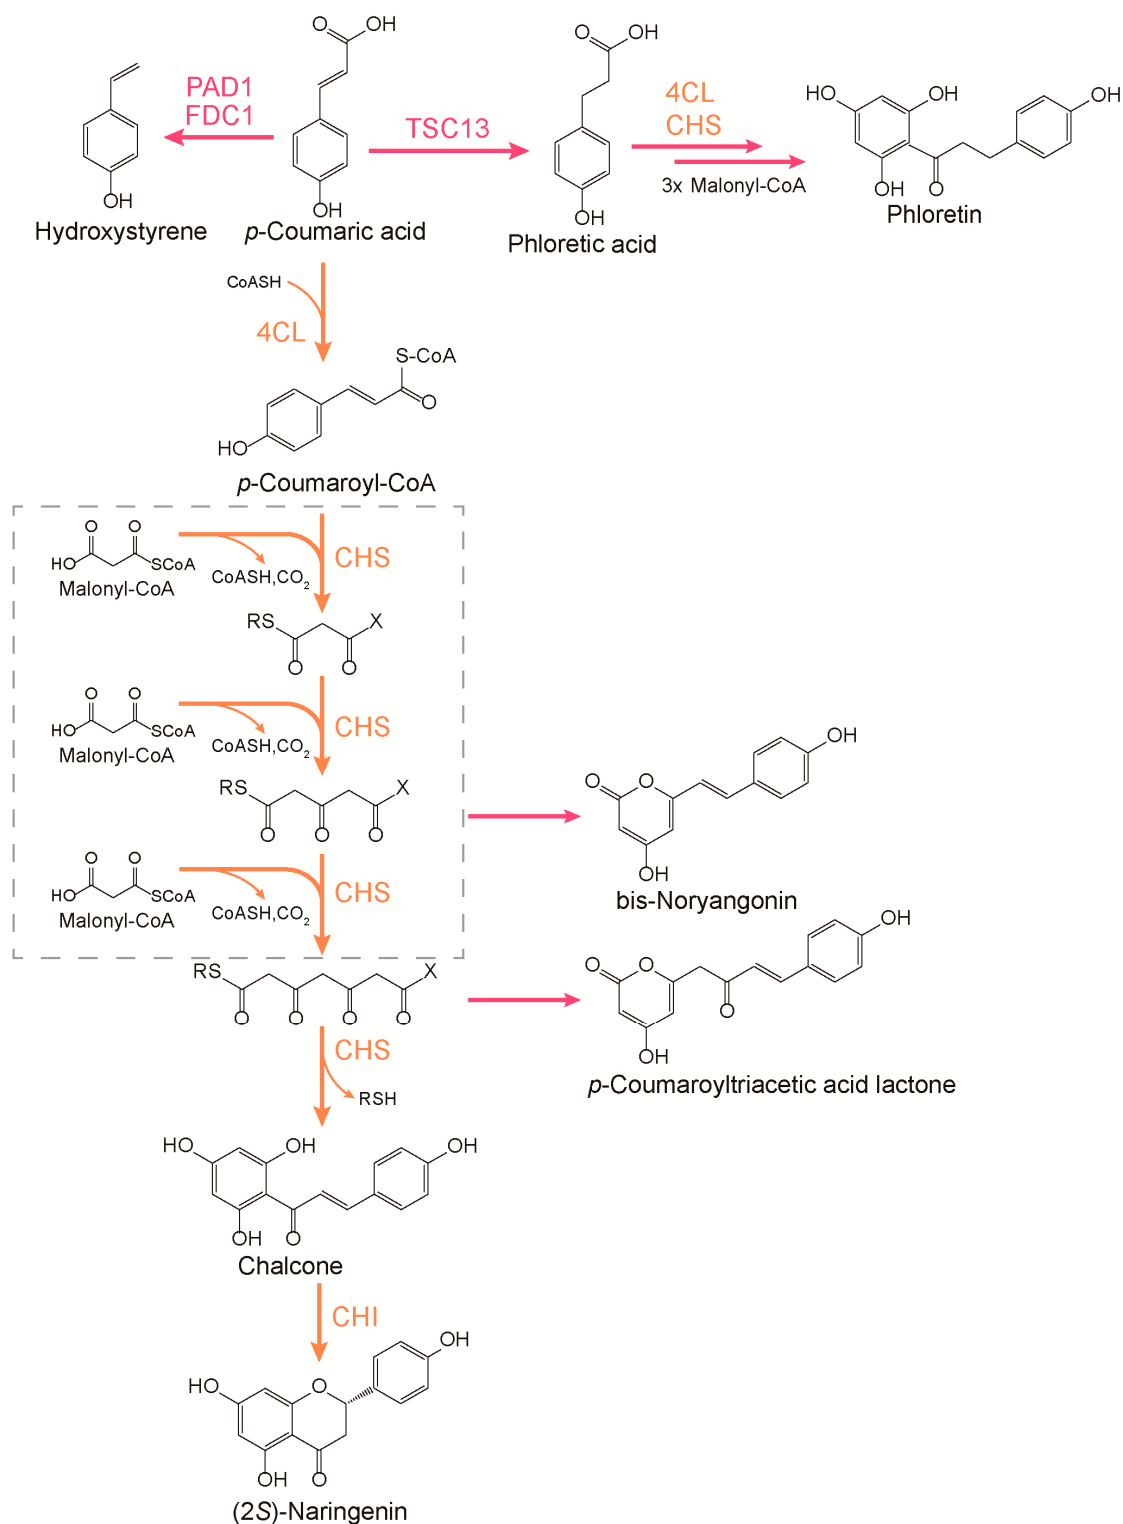

**Figure S1.** Synthesis of by-products during (2S)-naringenin synthesis. Pad1, Phenylacrylic acid decarboxylase; Fdc1, Ferulic acid decarboxylase; Tsc13, Enoyl reductase.

# Supplementary Tables

## Tables

**Table S1. Strains used in this study**

| Strains                                   | Genotype                                                                                                                                                      | Source     |
|-------------------------------------------|---------------------------------------------------------------------------------------------------------------------------------------------------------------|------------|
| <i>S. cerevisiae</i><br><i>CEN.PK2-1D</i> | <i>MAT<math>\alpha</math>, ura3-52, trp1-289, leu2-3,112, his3<math>\Delta</math>1, MAL2-8C, SUC2</i>                                                         | [1]        |
| C800                                      | <i>CEN.PK2-1D, gal80::kanMX</i>                                                                                                                               | [1]        |
| SQ01                                      | C800, XI-2::( <i>GAL7p-FjTAL-DIT1t</i> )                                                                                                                      | This study |
| SQ02                                      | C800, XI-2::( <i>INO1p-FjTAL-DIT1t</i> )                                                                                                                      | This study |
| SQ03                                      | C800,<br>XI-5::( <i>CYC1t-AtC4H-TDH1p</i> )+(PKG1p-AtPAL2-CIT2t)+<br>( <i>SDH1t-AtATR2-TDH3p</i> )+(SED1p-CYB5-PDB1t)                                         | This study |
| SQ04                                      | C800,<br>XI-5::( <i>CYC1t-AtC4H-GAL10p</i> )+(GAL1p-AtPAL2-CIT2t)<br>+( <i>SDH1t-AtATR2-TDH3p</i> )+(SED1p-CYB5-PDB1t)                                        | This study |
| SQ05                                      | C800,<br>XI-5::( <i>CYC1t-AtC4H-GAL10p</i> )+(GAL1p-AtPAL2-CIT2t)<br>+( <i>SDH1t-AtATR2-TDH3p</i> )+(SED1p-CYB5-PDB1t),<br>XI-2::( <i>GAL7p-FjTAL-DIT1t</i> ) | This study |
| N01                                       | C800,<br>pY26-ADH1t-PhCHS-GAL10p-CCW12p-MsCHI-ADH2t-<br>SED1p-Pc4CL-CYC1t                                                                                     | This study |
| N02                                       | C800,<br>pY26-ADH1t-PhCHS-CCW12p-FBA1p-MsCHI-ADH2t-<br>GAL10p-Pc4CL-CYC1t                                                                                     | This study |
| N03                                       | C800,<br>pY26-ADH1t-PhCHS-GAL10p-FBA1p-MsCHI-ADH2t-S<br>ED1p-Pc4CL-CYC1t                                                                                      | This study |
| N04                                       | C800,<br>pY26-ADH1t-PhCHS-GAL10p-GAL1p-MsCHI-ADH2t-S<br>ED1p-Pc4CL-CYC1t                                                                                      | This study |
| N05                                       | C800,<br>pY26-ADH1t-PhCHS-GAL10p-CCW12p-MsCHI-ADH2t-<br>TDH1p-Pc4CL-CYC1t                                                                                     | This study |
| N06                                       | C800,<br>pY26-ADH1t-PhCHS-FBA1p-PGK1p-MsCHI-ADH2t-TD<br>H1p-Pc4CL-CYC1t                                                                                       | This study |
| N07                                       | C800, pY26-ADH1t-PhCHS-GAL10p-GAL1p<br>-MsCHI-ADH2t- GAL7p -Pc4CL-CYC1t                                                                                       | This study |
| N08                                       | C800,                                                                                                                                                         | This study |

|     |                                                                           |            |
|-----|---------------------------------------------------------------------------|------------|
|     | pY26-ADH1t-PhCHS-GAL10p-ALD5p-MsCHI-ADH2t-A<br>RO7p-Pc4CL-CYC1t           |            |
| N09 | C800,<br>pY26-ADH1t-PhCHS-ERG20p-PGK1p-MsCHI-ADH2t-S<br>ED1p-Pc4CL-CYC1t  | This study |
| N10 | C800,<br>pY26-ADH1t-PhCHS-GAL10p-PGK1p-MsCHI-ADH2t-A<br>RO7p-Pc4CL-CYC1t  | This study |
| N11 | C800,<br>pY26-ADH1t-PhCHS-TDH1p-PGK1p-MsCHI-ADH2t-SE<br>D1p-Pc4CL-CYC1t   | This study |
| N12 | C800,<br>pY26-ADH1t-PhCHS-TDH1p-PGK1p-MsCHI-ADH2t-A<br>RO7p-Pc4CL-CYC1t   | This study |
| N13 | C800,<br>pY26-ADH1t-PhCHS-TDH1p-PGK1p-MsCHI-ADH2t-M<br>ET6p-Pc4CL-CYC1t   | This study |
| N14 | C800,<br>pY26-ADH1t-PhCHS-GAL10p-FBA1p-MsCHI-ADH2t-S<br>ED1p-Pc4CL-CYC1t  | This study |
| N15 | C800,<br>pY26-ADH1t-PhCHS-ERG20p-FBA1p-MsCHI-ADH2t-S<br>ED1p-Pc4CL-CYC1t  | This study |
| N16 | C800,<br>pY26-ADH1t-PhCHS-CCW12p-PGK1p-MsCHI-ADH2t-S<br>ED1p-Pc4CL-CYC1t  | This study |
| N17 | C800,<br>pY26-ADH1t-PhCHS-GAL10p-CCW12p-MsCHI-ADH2t-<br>TDH1p-Pc4CL-CYC1t | This study |
| N18 | C800,<br>pY26-ADH1t-PhCHS-FBA1p-CCW12p-MsCHI-ADH2t-T<br>DH1p-Pc4CL-CYC1t  | This study |
| N19 | C800,<br>pY26-ADH1t-PhCHS-GAL10p-PGK1p-MsCHI-ADH2t-S<br>ED1p-Pc4CL-CYC1t  | This study |
| N20 | C800,<br>pY26-ADH1t-PhCHS-GAL10p-TDH1p-MsCHI-ADH2t-S<br>ED1p-Pc4CL-CYC1t  | This study |
| N21 | C800,<br>pY26-ADH1t-PhCHS-GAL10p-PGK1p-MsCHI-ADH2t-<br>MET6p-Pc4CL-CYC1t  | This study |

|     |                                                                                                                                     |            |
|-----|-------------------------------------------------------------------------------------------------------------------------------------|------------|
| N22 | C800,<br>pY26-ADH1t-PhCHS-GAL10p-TDH1p-MsCHI-ADH2t-<br>MET6p-Pc4CL-CYC1t                                                            | This study |
| N23 | SQ05,<br>pY26-ADH1t-PhCHS-GAL10p-ALD5p-MsCHI-ADH2t-A<br>RO7p-Pc4CL-CYC1t                                                            | This study |
| N24 | SQ05,<br>pY26-ADH1t-PhCHS-GAL10p-ALD5p-MsCHI-ADH2t-A<br>RO7p-Pc4CL-Tsynth27                                                         | This study |
| N25 | SQ05,<br>pY26-ADH1t-PhCHS-GAL10p-ALD5p-MsCHI-ADH2t-A<br>RO7p-Pc4CL-HOG1t                                                            | This study |
| N26 | SQ05,<br>pY26-SynTer8-PhCHS-GAL10p-ALD5p-MsCHI-ADH2t-<br>ARO7p-Pc4CL-CYC1t                                                          | This study |
| N27 | SQ05,<br>pY26-CPS1t-PhCHS-GAL10p-ALD5p-MsCHI-ADH2t-A<br>RO7p-Pc4CL-CYC1t                                                            | This study |
| N28 | SQ05,<br>pY26-ADH1t-PhCHS-GAL10p-ALD5p-MsCHI-T-1300ste<br>m6-ARO7p-Pc4CL-CYC1t                                                      | This study |
| N29 | SQ05,<br>pY26-ADH1t-PhCHS-GAL10p-ALD5p-MsCHI-DIT1t-A<br>RO7p-Pc4CL-CYC1t                                                            | This study |
| N30 | SQ05,<br>pY26-CPS1t-PhCHS-GAL10p-ALD5p-MsCHI-ADH2t-AR<br>O7p-Pc4CL-HOG1t                                                            | This study |
| N31 | SQ05,<br>pY26-CPS1t-PhCHS-GAL10p-ALD5p-MsCHI-ADH2t-A<br>RO7p-Pc4CL-CYC1t, PRS424-SED1p-ThF3'H- TPS1t                                | This study |
| N32 | SQ05,<br>pY26-CPS1t-PhCHS-GAL10p-ALD5p-MsCHI-ADH2t-A<br>RO7p-Pc4CL-CYC1t, PRS424-SED1p-ThF3'H- TPS1t,<br>PRS425-SED1p-ThF3'H- TPS1t | This study |

**Table S2. Plasmids used in this study**

| Plasmids                                                          | Source     |
|-------------------------------------------------------------------|------------|
| pY26-ADH1t-PhCHS-GAL10p-CCW12p-MsCHI-ADH2t-SED1p-Pc4CL-CYC1t      | This study |
| pY26-ADH1t-PhCHS-CCW12p-FBA1p-MsCHI-ADH2t-GAL10p-Pc4CL-CYC1t      | This study |
| pY26-ADH1t-PhCHS-GAL10p-FBA1p-MsCHI-ADH2t-SED1p-Pc4CL-CYC1t       | This study |
| pY26-ADH1t-PhCHS-GAL10p-GAL1p-MsCHI-ADH2t-SED1p-Pc4CL-CYC1t       | This study |
| pY26-ADH1t-PhCHS-GAL10p-CCW12p-MsCHI-ADH2t-TDH1p-Pc4CL-CYC1t      | This study |
| pY26-ADH1t-PhCHS-FBA1p-PGK1p-MsCHI-ADH2t-TDH1p-Pc4CL-CYC1t        | This study |
| pY26-ADH1t-PhCHS-GAL10p-GAL1p -MsCHI-ADH2t- GAL7p -Pc4CL-CYC1t    | This study |
| pY26-ADH1t-PhCHS-GAL10p-ALD5p-MsCHI-ADH2t-ARO7p-Pc4CL-CYC1t       | This study |
| pY26-ADH1t-PhCHS-ERG20p-PGK1p-MsCHI-ADH2t-SED1p-Pc4CL-CYC1t       | This study |
| pY26-ADH1t-PhCHS-GAL10p-PGK1p-MsCHI-ADH2t-ARO7p-Pc4CL-CYC1t       | This study |
| pY26-ADH1t-PhCHS-TDH1p-PGK1p-MsCHI-ADH2t-SED1p-Pc4CL-CYC1t        | This study |
| pY26-ADH1t-PhCHS-TDH1p-PGK1p-MsCHI-ADH2t-ARO7p-Pc4CL-CYC1t        | This study |
| pY26-ADH1t-PhCHS-TDH1p-PGK1p-MsCHI-ADH2t-MET6p-Pc4CL-CYC1t        | This study |
| pY26-ADH1t-PhCHS-GAL10p-FBA1p-MsCHI-ADH2t-SED1p-Pc4CL-CYC1t       | This study |
| pY26-ADH1t-PhCHS-ERG20p-FBA1p-MsCHI-ADH2t-SED1p-Pc4CL-CYC1t       | This study |
| pY26-ADH1t-PhCHS-CCW12p-PGK1p-MsCHI-ADH2t-SED1p-Pc4CL-CYC1t       | This study |
| pY26-ADH1t-PhCHS-GAL10p-CCW12p-MsCHI-ADH2t-TDH1p-Pc4CL-CYC1t      | This study |
| pY26-ADH1t-PhCHS-FBA1p-CCW12p-MsCHI-ADH2t-TDH1p-Pc4CL-CYC1t       | This study |
| pY26-ADH1t-PhCHS-GAL10p-PGK1p-MsCHI-ADH2t-SED1p-Pc4CL-CYC1t       | This study |
| pY26-ADH1t-PhCHS-GAL10p-TDH1p-MsCHI-ADH2t-SED1p-Pc4CL-CYC1t       | This study |
| pY26-ADH1t-PhCHS-GAL10p-PGK1p-MsCHI-ADH2t-MET6p-Pc4CL-CYC1t       | This study |
| pY26-ADH1t-PhCHS-GAL10p-TDH1p-MsCHI-ADH2t-MET6p-Pc4CL-CYC1t       | This study |
| pY26-ADH1t-PhCHS-GAL10p-ALD5p-MsCHI-ADH2t-ARO7p-Pc4CL-Tsynth27    | This study |
| pY26-ADH1t-PhCHS-GAL10p-ALD5p-MsCHI-ADH2t-ARO7p-Pc4CL-HOG1t       | This study |
| pY26-SynTer8-PhCHS-GAL10p-ALD5p-MsCHI-ADH2t-ARO7p-Pc4CL-CYC1t     | This study |
| pY26-CPS1t-PhCHS-GAL10p-ALD5p-MsCHI-ADH2t-ARO7p-Pc4CL-CYC1t       | This study |
| pY26-ADH1t-PhCHS-GAL10p-ALD5p-MsCHI-T-1300stem6-ARO7p-Pc4CL-CYC1t | This study |
| pY26-ADH1t-PhCHS-GAL10p-ALD5p-MsCHI-DIT1t-ARO7p-Pc4CL-CYC1t       | This study |
| pY26-CPS1t-PhCHS-GAL10p-ALD5p-MsCHI-ADH2t-ARO7p-Pc4CL-HOG1t       | This study |
| PRS424-SED1p-ThF3'H- TPS1t                                        | This study |
| PRS425-SED1p-ThF3'H- TPS1t                                        | This study |

**Table S3. Primers used in this study**

| Primers  | Sequence (5'-3')                                          |
|----------|-----------------------------------------------------------|
| X-2 us-F | CGTCTATGAGGAGACTGTTAGTTGG                                 |
| X-2 us-R | GACCACTTCGAGAGCAAGTTGC                                    |
| GAL7p-F  | CAATGTGCCATAAACTCCGTGCACCATTTGCCAGCTTACTATCCTTCTTG        |
| GAL7p-R  | CTCAAGTATTCATTAATGGTGTTCATTTTTGAGGGAATATCAACTGTTTTTT<br>T |
| FjTAL-F  | ATGAACACCATTAATGAATACTTGAG                                |
| FjTAL-R  | TTAATTGTTAATCAAATGATCCTTAACC                              |
| DIT1t-F  | GGTTAAGGATCATTTGATTAACAATTAATAAAGTAAGAGCGCTACATTGG        |

|            |                                                                |
|------------|----------------------------------------------------------------|
| DIT1t-R    | TATGAAGCAGCCAATACCTGTTTTACAACTTGTTACTCCGCAACGCTTTTC            |
| INO1-F     | CAATGTGCCATAAACTCCGTGCACCAGAAGACGATGAGGCCGGTGC                 |
| INO1-R     | CTCAAGTATTCATTAATGGTGTTCATTGTTACTTCTTTTTCACTGGAAAAAA<br>AAGG   |
| XI-5 us-F  | GCGGAGAAGTCGTTGATAGCATTTC                                      |
| XI-5 us-R  | TGGTGCACGGAGTTTATGGCAC                                         |
| XI-5 ds-F  | TTGTAAACAGGTATTGGCTGC                                          |
| XI-5 ds-R  | GATCATAGATCCGGCACTTAGAG                                        |
| CYC1t-R    | CAATGTGCCATAAACTCCGTGCACCAGCAAATTAAAGCCTTCGAGCGTC              |
| CYC1t-F    | TATTGTTATGAAGCCAAGAACTGTTAAACAGGCCCTTTTCCTTTGTCTGA             |
| AtC4H-F    | TTAACAGTTTCTTGGCTTCATAACAATAATAG                               |
| AtC4H-R    | ATGGATTTGTTGTTGTTGGAAAAGTC                                     |
| TDH1p-R    | AGACTTTTCCAACAACAACAATCCATTTTGTGTTGTGTAAATTTAGTGA<br>AGTACTG   |
| TDH1p-F    | AGGGAAACACTTCCTTTTTCTGGCCCTGAAACCACACCGTGGGGCCTTG              |
| PGK1p-F    | GGGCCAGAAAAAGGAAGTGTTTC                                        |
| PGK1p-R    | CAACATGGCTTCAATTTGATCCATTGTTTTATATTGTTGTAAAAAGTAGATA<br>ATTAC  |
| AtPAL2-F   | ATGGATCAAATTGAAGCCATGTTG                                       |
| AtPAL2-R   | GGGGTGTAAGTAGGATGTAATCCAAATTAAACAAATTGGAATTGGAGCA<br>CCG       |
| CIT2t-F    | TTGGATTACATCCTACTTTTACACCC                                     |
| CIT2t-R    | GCCGGAATAGTGCAAATTGTATG                                        |
| SDH1t-R    | GATTCATACAATTTGCACTATTCGGGCGACAGCACCTTGACAGCAATTC              |
| SDH1t-F    | GGTAGATACTTGAGAGATGTTTGGTAATTTGAACCTCATTGTATTTACGG             |
| AtATR2-F   | TTACCAAACATCTCTCAAGTATCTACCG                                   |
| AtATR2-R   | ATGAAGAACATGATGAACTACAAGTTG                                    |
| TDH3p-R    | CAACTTGTAGTTCATCATGTTCTTCATTTTGTGTTTATGTGTGTTTATTCGA<br>AAC    |
| TDH3p-F    | AGCAATCAGTGGTGTATGGAAGGTAGAATAAAAAACACGCTTTTTTCAGTTC<br>GAG    |
| SED1-F     | TCTACCTTCCATACACCACTGATTG                                      |
| SED1-R     | CATCTTAATAGAGCGAACGTATTTTATTTTG                                |
| CYB5-F     | AATAAAATACGTTTCGCTCTATTAAGATGATGCCTAAAGTTTACAGTTACCAA<br>G     |
| CYB5-R     | CTCTCCTTCCTATTGGATTGAAGTTTATTCGTTCAACAAATAATAAGCAAC<br>AC      |
| PDB1t-F    | AACTTCAATCCAATAGGAAGGAGAG                                      |
| PDB1t-R    | ATGAAGCAGCCAATACCTGTTTTACAACCTTTCGCTTAGGTTCCATGCC              |
| GAL1,10p-R | AGACTTTTCCAACAACAACAATCCATTTATATTGAATTTTCAAAAATTCTT<br>ACTTTTT |
| GAL1,10p-F | ACAACATGGCTTCAATTTGATCCATTATAGTTTTTTCTCCTTGACGTAAAGT<br>ATAG   |
| pRS424-F   | TATAGCATGAGGTCGCTCAGCTCCAGCTTTTGTTCCTTTAG                      |
| ADH1t-R    | AACAAAAGCTGGAGCTGAGCGACCTCATGCTATACC                           |
| PhCHS-F    | GTTCTGAAACTGTCTCCCCAGCTTTGGATGGTTACGGTGGAAGAATACC              |
| CCW12-F    | GCTGGCTATTGGCGTCTGATTTTC                                       |

|                 |                                                                 |
|-----------------|-----------------------------------------------------------------|
| PGK1p-F         | CGGAAATCAGACGCCAATAGCCAGCGGGCCAGAAAAAGGAAGTGTTTC                |
| Pc4CL-R         | AAAAAGTAAGAATTTTTGAAAATTCAATATAAATGGGTGACTGCGTTGCCC<br>CG       |
| FBA1p-F         | CGGAAATCAGACGCCAATAGCCAGCATAACAATACTGACAGTACTAAATAA<br>TTGC     |
| ADH2t-R         | CTATACTTTAACGTCAAGGAGAAAAAACTATAATGAGAAATATCGAGGGAG<br>ACGA     |
| FBA1p-F         | TACTTTAACGTCAAGGAGAAAAAACTATAATAACAATACTGACAGTACTAA<br>ATAATTGC |
| PhCHS-F         | CATATATAACCATAACCAAGTAATACATATTCAAAATGGTTACGGTGGAAGA<br>ATACC   |
| FBA1p-F         | AACGGAAATCAGACGCCAATAGCCAGCATAACAATACTGACAGTACTAAAT<br>AATTGC   |
| FBA1p-F         | GAGGGAAACACTTCCTTTTTCTGGCCCATAACAATACTGACAGTACTAAATA<br>ATTGC   |
| GAL1,10p-1<br>F | TATAGTTTTTTCTCCTTGACGTTAAAG                                     |
| GAL1,10p-1<br>R | TTATATTGAATTTTCAAAAATTCTTACTTTTT                                |
| CCW12-R         | CCAAAGCTGGGGAGACAGTTTC                                          |
| CCW12-F         | GCTGGCTATTGGCGTCTGAT                                            |
| PGK1p-F         | CAGACGCCAATAGCCAGCACGCACAGATATTATAACATCTGC                      |
| FBA1p-F         | TGTTATAATATCTGTGCGTATAACAATACTGACAGTACTAAATAATTGC               |
| PGK1p-F         | ACGCACAGATATTATAACATCTGC                                        |
| ADH2t-R         | GGATAGTAAGCTGGCAAAATGAGAAATATCGAGGGAGACGA                       |
| GAL7p-F         | TTTGCCAGCTTACTATCCTTCTTG                                        |
| GAL7p-R         | TTTTGAGGGAATATTCAACTGTTTTTTT                                    |
| Pc4CL-R         | GTTGAATATTCCCTCAAAAATGGGTGACTGCGTTGCC                           |
| PhCHS-F         | ATGGTTACGGTGGAAGAATACCG                                         |
| Pc4CL-F         | ATGGGTGACTGCGTTGCC                                              |
| MsCHI-F         | ATGGCAGCAAGCATTACGGC                                            |
| JID1t-R         | ATCTTATACCAATTTTATGCAGGATGCTG                                   |
| ERG20p-F        | GTTATAATATCTGTGCGTCTCACACTTTGGTTCTTCGAC                         |
| PGK1p-R         | CGTAATGCTTGCTGCCATTTATATTTGTTGTAAAAAGTAGATAATTAC                |
| SED1-F          | GCATAAAATTGGTATAAGATTCTACCTTCCATACACCACTGATTG                   |
| SED1-R          | GCAACGCAGTCACCCATCTTAATAGAGCGAACGTATTTTATTTTGC                  |
| PGK1p-F         | GTCAAGGAGAAAAAACTATAACGCACAGATATTATAACATCTGC                    |
| TDH1p-R         | TTCTTCCACCGTAACCATTTTGTTTTGTGTGTAAATTTAGTGAAG                   |
| TDH1p-F         | GTTATAATATCTGTGCGTTGAAACCACACCGTGGGG                            |
| MET6p-F         | GCATAAAATTGGTATAAGATCATGAACCAGGGTCCCGCAC                        |
| MET6p-R         | GCAACGCAGTCACCCATTTTGTATGTACTTTGAAATTATATTGG                    |
| FBA1p-R         | GTAATGCTTGCTGCCATTTTGAATATGTATTACTTGATTATGG                     |
| ERG20p-F        | GTAAGTGTGAGTATTGTTATCTCACACTTTGGTTCTTCGAC                       |
| FBA1p-F         | ATAACAATACTGACAGTACTAAATAATTGC                                  |
| CCW12p-R        | CTTCCACCGTAACCATCCAAAGCTGGGGAGACAGTTTC                          |
| CCW12p-R        | GTAATGCTTGCTGCCATCCAAAGCTGGGGAGACAGTTTC                         |

|                    |                                                                                    |
|--------------------|------------------------------------------------------------------------------------|
| TDH1p-F            | GCATAAAATTGGTATAAGATTGAAACCACACCGTG GGGC                                           |
| TDH1p-R            | GCAACGCAGTCACCCATTTTGT TTTGTGTGTAAATTTAGTGAAG                                      |
| FBA1p-R            | TTCTTCCACCGTA ACCATTTTGAATATGTATTACTTGGTTATGG                                      |
| FBA1p-F            | GACGCCAATAGCCAGCATAACAATACTGACAGTACTAAATAATTGC                                     |
| TDH1p-F            | GTCAAGGAGAAAAAACTATATGAAACCACACCGTG GGG                                            |
| TDH1p-R            | GTAATGCTTGCTGCCATTTTGT TTTGTGTGTAAATTTAGTGAAGTAC                                   |
| pRS424C-F          | GTCTCCCTCGATATTTCTCATAGCTCCAGCTTTTGTTC CCTTAG                                      |
| pRS424C-R          | CCTGCCGAAGTAATCATGTAATTAGTTATGTCACGCTTACATTC                                       |
| Pc4CL-F            | GTGACATAACTAATTACATGATTACTTCGGCAGGTCGCCGCTCG                                       |
| Pc4CL-R            | AATACGTTTCGCTCTATTAAGATGGGTGACTGCGTTGCC CCG                                        |
| SED1-R             | GTCACCCATCTTAATAGAGCGAACGTATTTTTAT TTTGC                                           |
| SED1-F             | CAAAGTGTGAGTCTACCTTCCATACACCA CTGATTG                                              |
| ERG20-F            | GTGGTGTATGGAAGGTAGACTCACACTTTGG TTCTTCGAC                                          |
| ERG20-R            | ATTCTTCCACCGTA ACCATTTCTACGTAATATTTT GAGTTTATTGTGC                                 |
| PhCHS-F            | ATTACGTAGAAA TG GTTACGGTGGAAGAATACC                                                |
| PhCHS-R            | AAATCATAAGAAATTCGCTTAGGTAGCCAC ACTATGCAG                                           |
| ADH1t-F            | GTGGCTACCTAAGCGAATTTCTTATGATTTATG ATTTTATT                                         |
| ADH1t-R            | TTCCTTTTTCTGGCCCCGAGCGACCTCATGCTAT ACC                                             |
| PGK1p-F            | ATGAGGTCGCTCGGGCCAGAAAAAGGAAGTGTT TC                                               |
| PGK1p-R            | AATGCTTGCTGCCATTGTTTATATTTGTTGT AAAAAGTAGATAATTAC                                  |
| MsCHI-F            | CAACAAATATAAAACAATGGCAGCAAGCATTAC GG C                                             |
| MsCHI-R            | GACATAAGAGATCCGCTCAGTTACCGATTTT AAAGGCACCTTC                                       |
| ADH2t-F            | AAATCGGTA A CTGAGCGGATCTCTTATGTCTT TACG                                            |
| ADH2t-R            | GCTGGAGCTATGAGAAATATCGAGGGAGAC GA                                                  |
| DIT1t-F            | CGGTA ACTGATAAAGTAAGAGCGCTACATTGG TC                                               |
| DIT1-R             | CTGGAGCTTTACTCCGCAACGCTTTTCTG                                                      |
| SDIT1t-F           | TTGCGGAGTAAAGCTCCAGCTTTTGTTC CCTT TAG                                              |
| SDIT1-R            | TCTTACTTTATCAGTTACCGATTTTAAAGGC ACCTTC                                             |
| T-1300 stem<br>6-F | CTTGTGGAAAAAAGGGGGAAAGGGCCCCCTT CAAAAGCTCCAGCTTTTG<br>TTCCCTTTAG                   |
| T-1300 stem<br>6-R | TTTCCCCTTTTTTCCACAAGGGATATATATATATATATATATATATATATATCAGTTA<br>CCGATTTTAAAGGCACCTTC |
| CPS1t-F            | CTACCTAAGCGCAATGATTGAATAGTCAA AG                                                   |
| CPS1t-R            | TCTGGCCCATTTGACACTTGATTTGACACTTC                                                   |
| SCPS1t-F           | CAAGTGTCAAATGGGCCAGAAAAAGGAAGTGTT TC                                               |
| SCPS1t-R           | AATCATTGCGCTTAGGTAGCCACACTATGCAG                                                   |
| SynTer8-F          | TAAAGACGTTGAGTCCGTTGAGAGTATCATCGAGTATCATCTTTC AAAGGG<br>CCAGAAAAAGGAAGTGTTTC       |
| SynTer8-R          | CAACGGACTCAACGTCTTTATTTCTAGACAGTTATATATTAGGTAGCCACAC<br>TATGCAG                    |
| HOG1t-F            | AGTAATTTAATGTCCCTAACCACTCATTC                                                      |
| HOG1t-R            | GGTACCGGCCTACGCTTGTCTGGGTGAGAC                                                     |
| SHOG1t-F           | ACAAGCGTAGGCCGGTACCCAATTCGCC C                                                     |
| SHOG1t-R           | GTTAGGGACATTAAATTACTTCGGCAGGTCGCCGCT CG                                            |
| Tsynth27-F         | AACTGTCTAGAAATAAAGAGTATCATCTTTCAAAGGCCGGTACCCAATT CG<br>CC                         |

|            |                                                                                     |
|------------|-------------------------------------------------------------------------------------|
| Tsynth27-R | ACTCTTTATTTCTAGACAGTTATATATATATATATATATATATATATATATACCACCCATTA<br>CTTCGGCAGGTCGCCGC |
| SED1p-R    | CTTAATAGAGCGAACGTATTTTATTTTGCTTGTCT                                                 |
| ThF3'H-F   | AATAAAATACGTTTCGCTCTATTAAGATGAGCATCCTGATCATCATCATCCT                                |
| ThF3'H-R   | GATCGTCTCATTGTCATCGGGTTCATTAGCATTCAACAACCTTCATACGCACC                               |
| TPS1t-F    | TGAACCCGATGCAAATGAGACG                                                              |
| URA3-F     | GCAGATTGTACTGAGAGTGCACC                                                             |
| URA3-R     | ACGCATCTGTGCGGTATTTTAC                                                              |
| Prs425-F   | GAAATACCGCACAGATGCGTAAG                                                             |
| Prs425-R   | GCACTCTCAGTACAATCTGCTC                                                              |

**Table S4. Exogenous genes used in this study**

| Exogenous gene | NCBI Reference Sequence | Enzyme                           | Organism                         | Reference |
|----------------|-------------------------|----------------------------------|----------------------------------|-----------|
| <i>FjTAL</i>   | WP_012023194.1          | tyrosine ammonia-lyase           | <i>Flavobacterium johnsoniae</i> | [1]       |
| <i>AtPAL2</i>  | NP_190894.1             | phenylalanine ammonia-lyase<br>2 | <i>Arabidopsis thaliana</i>      | [1]       |
| <i>AtC4H</i>   | NP_180607.1             | cinnamate-4-hydroxylase          | <i>Arabidopsis thaliana</i>      | [1]       |
| <i>AtATR2</i>  | NP_001328167.1          | P450 reductase 2                 | <i>Arabidopsis thaliana</i>      | [1]       |
| <i>Pc4CL</i>   | P14912.1                | 4-coumaroyl-CoA ligase           | <i>Petroselinum crispum</i>      | [1]       |
| <i>PhCHS</i>   | AAF60297.1              | chalcone synthase                | <i>Petunia x hybrida</i>         | [1]       |
| <i>MsCHI</i>   | P28012.1                | Chalcone isomerase 1             | <i>Medicago sativa</i>           | [1]       |
| <i>ThF3'H</i>  | BAH22519.1              | flavonoid 3' hydroxylase         | <i>Tricyrtis hirta</i>           | [2]       |

**Table S5. Natural strong terminator and artificial strong terminator sequence**

| Terminator | Sequence (5'-3')                                                                                                                                                                                                                                                                                                                                                                                                                                                                                                    | Source |
|------------|---------------------------------------------------------------------------------------------------------------------------------------------------------------------------------------------------------------------------------------------------------------------------------------------------------------------------------------------------------------------------------------------------------------------------------------------------------------------------------------------------------------------|--------|
| Tsynth27   | TGGGTGGTATATATATATATATATATATATAACTGTCTAGAAATAAAG<br>AGTATCATCTTTCAAA                                                                                                                                                                                                                                                                                                                                                                                                                                                | [3]    |
| HOG1t      | TTTAATGTCCCTAACCACTCATTCTTACTTCTTTTGATGTTTCTTTTT<br>TTTATGGTACTCATAAAAGTATTTACGTATATAGTTGTATAGAGGAAA<br>CAAAAAAAAAAAGATAAACTCAATTACAAAGTAAAGTGGACGTA<br>TTTCGATCATGATTTTTTTCTGTTTTAACCGCATTGGATTTTCTTGTA<br>AAACTGGAAGAAAAAGGAACTAAAAAGTCAAGAAAGACCTTTTT<br>AAGACTCCAAGAACCGTCACTTATGGCGTATTGTTTGTATCAGCA<br>CTTCTATCTTCGATAAAGGTTTGTCTGTCTTATATTGTTTACATTCAA<br>GTCTAATTCTGTGCTTTTACCGAAGAGGAATTTTCATAAATACGGAG<br>AAAATATAAAAAAAAAAGTAAATACAGAAAATAGAACAGTTGAAGC<br>AGAAAAAGAGAACTTGCTAAATAGCTGTCTCACCCAGACAAGCGT | [4]    |

|                  |                                                                                                                                                                                                                                                                                                                                                                                                                                                                                         |     |
|------------------|-----------------------------------------------------------------------------------------------------------------------------------------------------------------------------------------------------------------------------------------------------------------------------------------------------------------------------------------------------------------------------------------------------------------------------------------------------------------------------------------|-----|
|                  | A                                                                                                                                                                                                                                                                                                                                                                                                                                                                                       |     |
| SynTer8          | TATATATATATAACTGTCTAGAAATAAAAAATAAAGATGATGAGAGTAT<br>CATCTTTCAAATTTCAAA                                                                                                                                                                                                                                                                                                                                                                                                                 | [5] |
| CPS1t            | GCGCAATGATTGAATAGTCAAAGATTTTTTTTTTTTAAATTTTTTTTTT<br>TTAATTTTTTTTTTTTTTTCATAGAACTTTTTATTTAATAAATCACGTC<br>TATATATGTATCAGTATAACGTAAAAAAAAAAAAACACCGTCAGTTAAA<br>CAAAACATAAATAAAAAAAAAAAAAAGAAGTGTCAAATCAAGTGTCAA<br>AT                                                                                                                                                                                                                                                                   | [6] |
| T-1300 stem<br>6 | TATATATATATATATATATATATATATCCCTTGTGGAAAAAAGGGGGAAAG<br>GGCCCCCTTTCAAA                                                                                                                                                                                                                                                                                                                                                                                                                   | [7] |
| DIT1t            | TAAAGTAAGAGCGCTACATTGGTCTACCTTTTTGTTCTTTTACTTAA<br>ACATTAGTTAGTTCGTTTTCTTTTTCTCATTTTTTTTATGTTTCCCCCCC<br>AAAGTTCTGATTTTATAATATTTTATTTACACAATTCCATTTAACAG<br>AGGGGGAATAGATTCTTTAGCTTAGAAAATTAGTGATCAATATATATT<br>TGCCTTTCTTTTCATCTTTTCAGTGATATTAATGGTTTCGAGACACTG<br>CAATGGCCCTAGTTGTCTAAGAGGATAGATGTTACTGTCAAAGATGA<br>TATTTTGAATTTCAATTGACGTAATTAATGATACTATTAATAATACAGA<br>GCGTATATGAAGTATTGCAAATAACATGCACAGTTCTTTTGGGATGA<br>GAATGATAATGAAAGGCGAAGGCGGGCGTTTCAGAAAAGCGTTGCG<br>GAGTAA | [8] |

---

## References

1. Gao, S.; Zhou, H.; Zhou, J.; Chen, J. Promoter-Library-Based Pathway Optimization for Efficient (2S)-Naringenin Production from *p*-Coumaric Acid in *Saccharomyces Cerevisiae*. *J Agric Food Chem.* **2020**, *68*, 6884-6891.
2. Liu, J.; Xiao, Z.; Zhang, S.; Wang, Z.; Chen, Y.; Shan, Y. Restricting Promiscuity of Plant Flavonoid 3'-Hydroxylase and 4'-*O*-Methyltransferase Improves the Biosynthesis of (2S)-Hesperetin in *E. Coli*. *J Agric Food Chem.* **2023**, *71*, 9826-9835.
3. Curran, K.A.; Morse, N.J.; Markham, K.A.; Wagman, A.M.; Gupta, A.; Alper, H.S. Short Synthetic Terminators for Improved Heterologous Gene Expression in Yeast. *ACS Synth Biol.* **2015**, *4*, 824-832.
4. Wei, L.; Wang, Z.; Zhang, G.; Ye, B. Characterization of Terminators in *Saccharomyces Cerevisiae* and an Exploration of Factors Affecting Their Strength. *Chembiochem.* **2017**, *18*, 2422-2427.
5. Ahmed, M.S.; Ikram, S.; Rasool, A.; Li, C. Design and Construction of Short Synthetic Terminators for B-Amyrin Production in *Saccharomyces Cerevisiae*. *Biochem Eng J.* **2019**, *146*, 105-116.
6. Curran, K.A.; Karim, A.S.; Gupta, A.; Alper, H.S. Use of Expression-Enhancing Terminators in *Saccharomyces Cerevisiae* to Increase Mrna Half-Life and Improve Gene Expression Control for Metabolic Engineering Applications. *Metab Eng.* **2013**, *19*, 88-97.
7. Wang, Z.; Wei, L.; Sheng, Y.; Zhang, G. Yeast Synthetic Terminators: Fine Regulation of Strength Through Linker Sequences. *Chembiochem.* **2019**, *20*, 2383-2389.
8. Ito, Y.; Yamanishi, M.; Ikeuchi, A.; Matsuyama, T. A Highly Tunable System for the Simultaneous Expression of Multiple Enzymes in *Saccharomyces Cerevisiae*. *ACS Synth Biol.* **2015**, *4*, 12-16.
